# Supplementary material for: Boosted Antioxidant Effect Using a Combinatory Approach with Essential Oils from Origanum compactum, Origanum majorana, Thymus serpyllum, Mentha spicata, Myrtus communis, and Artemisia herba-alba: Mixture Design Optimization
Source: MDPI journal article supplement (doi:10.3390/plants10122817), 2021-12-20
Supplement: s1 [file s1]

Supplementary Table S1. Chemical composition of *M. communis* essential oil.

| Compounds                         | Rt <sup>a</sup> | RI <sup>b</sup> | Peak area %  |
|-----------------------------------|-----------------|-----------------|--------------|
| $\alpha$ -Thujene                 | 5.28            | 924             | 0.16         |
| $\alpha$ -Pinene                  | 5.48            | 931             | 7.17         |
| $\beta$ -Pinene                   | 6.69            | 977             | 0.13         |
| $\delta$ -3-Carene                | 7.61            | 1009            | 0.15         |
| <i>o</i> -Cymene                  | 8.13            | 1024            | 1.05         |
| Limonene                          | 8.29            | 1028            | 8.96         |
| <b>1,8-Cineole</b>                | <b>8.41</b>     | <b>1032</b>     | <b>10.65</b> |
| <i>cis</i> -Linalool oxide        | 9.75            | 1070            | 0.27         |
| <i>trans</i> -linalool oxide      | 10.34           | 1087            | 0.25         |
| <b>Linalool</b>                   | <b>10.87</b>    | <b>1103</b>     | <b>19.77</b> |
| Terpinen-4-ol                     | 14.13           | 1180            | 0.20         |
| <i>p</i> -Cymen-8-ol              | 14.42           | 1187            | 0.09         |
| <i>cis</i> -3-Hexenyl butyrate    | 14.48           | 1188            | 0.12         |
| $\beta$ -Fenchyl alcohol          | 14.75           | 1195            | 3.1          |
| Estragole                         | 14.85           | 1197            | 0.34         |
| ( <i>L</i> )-carvone              | 16.76           | 1242            | 0.09         |
| Citral                            | 17.78           | 1266            | 0.1          |
| <b>Myrtenyl acetate</b>           | <b>20.12</b>    | <b>1321</b>     | <b>33.67</b> |
| Neryl acetate                     | 21.62           | 1356            | 0.18         |
| Methyl eugenol                    | 23.37           | 1398            | 0.96         |
| <i>trans</i> -Caryophyllene       | 24.06           | 1415            | 0.22         |
| $\alpha$ -Humulene                | 25.52           | 1451            | 0.42         |
| 4,6-diethyl-2-methoxypyrimidine   | 27.91           | 1510            | 1.35         |
| Phenol, 2-(1,1-dimethylethyl)     | 28.56           | 1527            | 0.18         |
| Caryophyllene oxide               | 30.48           | 1576            | 0.32         |
| Humulene 1,2-epoxide              | 31.56           | 1604            | 0.41         |
| <b>Monoterpene hydrocarbons</b>   |                 |                 | 17.62        |
| <b>Oxygenated monoterpenes</b>    |                 |                 | 35.16        |
| <b>Sesquiterpene hydrocarbons</b> |                 |                 | 0.64         |
| <b>Oxygenated sesquiterpenes</b>  |                 |                 | 0.73         |
| <b>Others</b>                     |                 |                 | 36.15        |
| <b>Total</b>                      |                 |                 | 90.3         |

a: Retention time on DB-5 capillary column in minutes.

b: Retention index

Supplementary Table S2. Chemical composition of *A. herba-alba* essential oil.

| Compounds                         | Rt <sup>a</sup> | RI <sup>b</sup> | Peak area %  |
|-----------------------------------|-----------------|-----------------|--------------|
| $\alpha$ -Pinene                  | 5.48            | 931             | 0.10         |
| $\beta$ -Myrcene                  | 6.96            | 987             | 0.09         |
| <i>p</i> -cymene                  | 8.13            | 1023            | 1.31         |
| ( <i>D</i> )-Limonene             | 8.28            | 1028            | 0.20         |
| $\beta$ -Thujene                  | 8.35            | 1029            | 0.04         |
| Lavender lactone                  | 8.51            | 1034            | 0.12         |
| $\gamma$ -Terpinene               | 9.29            | 1056            | 0.14         |
| 3-Carene                          | 10.84           | 1099            | 0.11         |
| <i>cis</i> -4-Thujanol            | 12.55           | 1141            | 0.14         |
| Fenchone                          | 13.39           | 1162            | 0.43         |
| Terpinen-4-ol                     | 14.12           | 1179            | 0.68         |
| krypton                           | 14.37           | 1185            | 0.23         |
| ( <i>A</i> )-Terpineol            | 14.75           | 1195            | 1.77         |
| <b>Piperitone</b>                 | <b>17.26</b>    | <b>1254</b>     | <b>85.68</b> |
| Copaene                           | 22.28           | 1372            | 0.15         |
| (-)-Spathulenol                   | 30.32           | 1572            | 0.15         |
| (+)-Spathulenol                   | 30.32           | 1572            | 0.12         |
| Davanone                          | 30.44           | 1575            | 3.12         |
| <b>Monoterpene hydrocarbons</b>   |                 |                 | <b>1.99</b>  |
| <b>Oxygenated monoterpenes</b>    |                 |                 | <b>88.7</b>  |
| <b>Sesquiterpene hydrocarbons</b> |                 |                 | <b>0.15</b>  |
| <b>Oxygenated sesquiterpenes</b>  |                 |                 | <b>3.38</b>  |
| <b>Others</b>                     |                 |                 | <b>0.35</b>  |
| <b>Total</b>                      |                 |                 | <b>94.58</b> |

a: Retention time on DB-5 capillary column in minutes.

b: Retention index

Supplementary Table S3. Chemical composition of *O. majorana* essential oil.

| Compounds                               | Rt <sup>a</sup> | RI <sup>b</sup> | Peak area % |
|-----------------------------------------|-----------------|-----------------|-------------|
| (-)-Terpinene-4-ol                      | 14.12           | 1180            | 29.11       |
| ( <i>Z</i> )-4-Thujanol                 | 10.93           | 1101            | 24.57       |
| <i>p</i> -cymene                        | 8.14            | 1023            | 12.64       |
| $\alpha$ -Terpineol                     | 14.74           | 1195            | 9.05        |
| ( <i>E</i> )- $\beta$ -Terpineol        | 9.75            | 1069            | 5.45        |
| ( <i>Z</i> )-2-Menthenol                | 11.84           | 1124            | 2.16        |
| $\beta$ -Phellandrene                   | 6.52            | 971             | 2.14        |
| ( <i>Z</i> )-Sabinene hydrate acetate   | 17.19           | 1252            | 1.71        |
| ( <i>E</i> )-Sabinene hydrate acetate   | 17              | 1248            | 1.48        |
| ( <i>E</i> )- <i>p</i> -Menth-2-en-1-ol | 12.56           | 1141            | 1.27        |

|                                   |       |      |       |
|-----------------------------------|-------|------|-------|
| Caryophyllene oxide               | 30.48 | 1576 | 1.08  |
| 1,8-Cineole                       | 8.39  | 1031 | 1.05  |
| Limonene                          | 8.28  | 1028 | 0.98  |
| Spathulenol                       | 30.32 | 1572 | 0.82  |
| p-Cymene-8-ol                     | 14.41 | 1186 | 0.59  |
| $\beta$ -Myrcene                  | 6.95  | 987  | 0.4   |
| Caryophyllene                     | 24.05 | 1415 | 0.4   |
| $\alpha$ -Pinene                  | 5.48  | 932  | 0.35  |
| $\beta$ -Pinene                   | 6.68  | 977  | 0.19  |
| Sabinene                          | 5.28  | 924  | 0.17  |
| Verbenone                         | 15.11 | 1203 | 0.11  |
| <b>Monoterpene hydrocarbons</b>   |       |      | 16.87 |
| <b>Oxygenated monoterpenes</b>    |       |      | 76.55 |
| <b>Sesquiterpene hydrocarbons</b> |       |      | 0.4   |
| <b>Oxygenated sesquiterpenes</b>  |       |      | 1.9   |
| <b>Others</b>                     |       |      | 95.72 |

a: Retention time on DB-5 capillary column in minutes.

b: Retention index

**Supplementary Table S4. Chemical composition of *T. serpyllum* essential oil.**

| <b>Compounds</b>                  | <b>Rt<sup>a</sup></b> | <b>RI<sup>b</sup></b> | <b>Peak area %</b> |
|-----------------------------------|-----------------------|-----------------------|--------------------|
| <i>p</i> -Cymene                  | 8.14                  | 1023                  | 36.16              |
| $\gamma$ -Terpinene               | 9.3                   | 1056                  | 18.31              |
| Thymol                            | 18.48                 | 1292                  | 17.29              |
| Linalool                          | 10.85                 | 1099                  | 4.51               |
| Caryophyllene                     | 24.05                 | 1415                  | 3.13               |
| Thymol methyl ether               | 16.15                 | 1237                  | 3.02               |
| $\alpha$ -Terpinene               | 7.87                  | 1016                  | 2.61               |
| Limonene                          | 8.28                  | 1028                  | 2.2                |
| $\beta$ -myrcene                  | 6.95                  | 987                   | 1.88               |
| Sabinene                          | 5.28                  | 924                   | 1.75               |
| $\alpha$ -Pinene                  | 5.48                  | 932                   | 1.55               |
| Camphene                          | 5.92                  | 948                   | 0.66               |
| $\beta$ -Pinene                   | 6.68                  | 977                   | 0.62               |
| Borneol                           | 13.78                 | 1171                  | 0.59               |
| (-)-Terpinene-4-ol                | 14.12                 | 1180                  | 0.54               |
| (-)-Camphor                       | 12.74                 | 1146                  | 0.39               |
| $\beta$ -Thujene                  | 8.35                  | 1029                  | 0.37               |
| $\alpha$ -Phellandrene            | 7.53                  | 1007                  | 0.34               |
| $\beta$ -Farnesene                | 30.48                 | 1576                  | 0.28               |
| Terpinolene                       | 10.29                 | 1084                  | 0.25               |
| <i>p</i> -Cymenene                | 10.48                 | 1089                  | 0.22               |
| 1,8-cineole                       | 8.39                  | 1031                  | 0.18               |
| $\alpha$ -Terpineol               | 14.74                 | 1195                  | 0.15               |
| (+)-4-carene                      | 9.75                  | 1069                  | 0.13               |
| 3-Octanone                        | 6.82                  | 982                   | 0.11               |
| (+)-3-Carene                      | 7.6                   | 1009                  | 0.1                |
| <b>Monoterpene hydrocarbons</b>   |                       |                       | 65.4               |
| <b>Oxygenated monoterpenes</b>    |                       |                       | 28.87              |
| <b>Sesquiterpene hydrocarbons</b> |                       |                       | 3.533              |
| <b>Oxygenated sesquiterpenes</b>  |                       |                       | 0                  |
| <b>Others</b>                     |                       |                       | 0.09               |
| <b>Total</b>                      |                       |                       | 97.89              |

**a:** Retention time on DB-5 capillary column in minutes.

**b:** Retention index

Supplementary Table S5. Chemical composition of *O. compactum* essential oil.

| Compounds                         | Rt <sup>a</sup> | RI <sup>b</sup> | Peak area % |
|-----------------------------------|-----------------|-----------------|-------------|
| Carvacrol                         | 18.88           | 1301            | 47.85       |
| $\gamma$ -Terpinene               | 9.3             | 1056            | 17.25       |
| Thymol                            | 18.48           | 1292            | 15.75       |
| <i>p</i> -Cymene                  | 8.14            | 1023            | 8.44        |
| $\alpha$ -Terpinene               | 7.87            | 1016            | 2.19        |
| Caryophyllene                     | 24.05           | 1415            | 1.44        |
| $\beta$ -Myrcene                  | 6.95            | 987             | 1.42        |
| Linalool                          | 10.85           | 1099            | 1.36        |
| Sabinene                          | 5.28            | 924             | 1.06        |
| $\alpha$ -Pinene                  | 5.48            | 932             | 0.61        |
| (-)-Terpinene-4-ol                | 14.12           | 1180            | 0.43        |
| Limonene                          | 8.28            | 1028            | 0.25        |
| $\alpha$ -Phellandrene            | 7.53            | 1007            | 0.24        |
| $\beta$ -Pinene                   | 6.68            | 977             | 0.21        |
| $\beta$ -Thujene                  | 8.35            | 1029            | 0.21        |
| $\alpha$ -Terpineol               | 14.74           | 1195            | 0.16        |
| Borneol                           | 13.78           | 1171            | 0.15        |
| 2-Carene                          | 10.28           | 1084            | 0.12        |
| Camphene                          | 5.92            | 948             | 0.09        |
| 3-Octanone                        | 6.82            | 982             | 0.09        |
| <i>p</i> -Cymene                  | 10.48           | 1089            | 0.08        |
| Myrtenol                          | 14.84           | 1197            | 0.08        |
| (+)-3-Carene                      | 7.6             | 1009            | 0.07        |
| <i>cis</i> - $\beta$ -Ocimene     | 8.84            | 1043            | 0.06        |
| <b>Monoterpene hydrocarbons</b>   |                 |                 | 65.87       |
| <b>Oxygenated monoterpenes</b>    |                 |                 | 32.01       |
| <b>Sesquiterpene hydrocarbons</b> |                 |                 | 1.44        |
| <b>Oxygenated sesquiterpenes</b>  |                 |                 | 0           |
| <b>Others</b>                     |                 |                 | 0.09        |
| <b>Total</b>                      |                 |                 | 99.65       |

a: Retention time on DB-5 capillary column in minutes.

b: Retention index

**Supplementary Table S6. Chemical composition of *M. spicata* essential oil.**

| <b>Compounds</b>                                           | <b>Rt<sup>a</sup></b> | <b>RI<sup>b</sup></b> | <b>Peak area %</b> |
|------------------------------------------------------------|-----------------------|-----------------------|--------------------|
| Carvone                                                    | 21.69                 | 1358                  | 26.00              |
| 1,8-cineole                                                | 8.41                  | 1031                  | 15.20              |
| $\beta$ -Myrcene                                           | 6.96                  | 987                   | 12.50              |
| Limonene                                                   | 8.29                  | 1028                  | 10.29              |
| ( <i>D</i> )-Germacrene                                    | 26.56                 | 1476                  | 6.86               |
| Caryophyllene                                              | 24.06                 | 1415                  | 6.41               |
| $\beta$ -Pinene                                            | 6.69                  | 977                   | 3.03               |
| 1-Butanone                                                 | 23.11                 | 1392                  | 2.08               |
| $\alpha$ -Pinene                                           | 5.49                  | 932                   | 1.72               |
| $\beta$ -Phellandrene                                      | 6.53                  | 971                   | 1.58               |
| ( <i>E</i> )- $\beta$ -Famesene                            | 25.51                 | 1451                  | 1.18               |
| $\gamma$ -Elemene                                          | 27.13                 | 1490                  | 0.77               |
| ( <i>E</i> )- $\beta$ -ocimene                             | 8.47                  | 1033                  | 0.75               |
| Pentanoic acid                                             | 16.42                 | 1234                  | 0.47               |
| (-)- $\beta$ -Bourbonene                                   | 22.59                 | 1380                  | 0.43               |
| $\gamma$ -Terpinene                                        | 9.3                   | 1056                  | 0.37               |
| Limonene                                                   | 14.74                 | 1194                  | 0.35               |
| Resorcinol                                                 | 12.19                 | 1132                  | 0.34               |
| $\beta$ -Elemene                                           | 22.86                 | 1386                  | 0.34               |
| Bicyclo[4.4.0]dec-1-ene, 2-isopropyl-5-methyl-9-methylene- | 25.79                 | 1458                  | 0.32               |
| $\beta$ -Methylallylbenzene                                | 10.49                 | 1089                  | 0.30               |
| $\alpha$ -Terpinolene                                      | 10.29                 | 1084                  | 0.28               |
| 2-Methylbutyl valerate                                     | 11.16                 | 1107                  | 0.26               |
| ( <i>E,Z</i> )-2,4-Hexadiene                               | 20.11                 | 1321                  | 0.26               |
| ( <i>D</i> )-cadinene                                      | 28.06                 | 1514                  | 0.25               |
| (+/-)-Pulegone                                             | 16.5                  | 1236                  | 0.24               |
| 5-Isopropenyl-2-methylcyclopent-1-enecarboxaldehyde        | 20.71                 | 1335                  | 0.24               |
| Citronellol                                                | 16.07                 | 1226                  | 0.23               |
| Isovaleric acid                                            | 11.09                 | 1105                  | 0.23               |

|                                                        |       |      |       |
|--------------------------------------------------------|-------|------|-------|
| Terpinene-4-ol                                         | 14.12 | 1179 | 0.23  |
| (+)-4-Carene                                           | 7.87  | 1016 | 0.23  |
| <i>cis</i> -Sabinen hydrate                            | 9.75  | 1069 | 0.22  |
| <i>cis</i> -( <i>Z</i> )- $\alpha$ -Bisabolene epoxide | 30.48 | 1576 | 0.20  |
| $\alpha$ -Terpineol                                    | 13.71 | 1169 | 0.19  |
| $\gamma$ -Selinene                                     | 32.03 | 1617 | 0.19  |
| Linalool                                               | 10.85 | 1099 | 0.18  |
| 3-Octanol                                              | 7.19  | 996  | 0.17  |
| Cymen-8-ol                                             | 14.41 | 1186 | 0.17  |
| <i>n</i> -Amyl isovalerate                             | 10.95 | 1102 | 0.16  |
| $\alpha$ -Muurolene                                    | 26.35 | 1471 | 0.15  |
| $\alpha$ -ocimene                                      | 8.85  | 1043 | 0.15  |
| $\beta$ -Citronellol                                   | 18.01 | 1271 | 0.15  |
| <i>cis</i> -Jasmone                                    | 22.99 | 1389 | 0.15  |
| Copaene                                                | 22.27 | 1372 | 0.14  |
| Butanoic Acid                                          | 16.2  | 1229 | 0.14  |
| Spatulenol                                             | 30.31 | 1572 | 0.13  |
| Isopiperitenone                                        | 17.8  | 1266 | 0.13  |
| <i>l</i> -Calamenene                                   | 28.12 | 1515 | 0.12  |
| 1.5.5-Trimethyl-6-methylene-cyclohexene                | 20.43 | 1328 | 0.11  |
| <b>Monoterpene hydrocarbons</b>                        |       |      | 31.53 |
| <b>Oxygenated monoterpenes</b>                         |       |      | 43.68 |
| <b>Sesquiterpene hydrocarbons</b>                      |       |      | 10.22 |
| <b>Oxygenated sesquiterpenes</b>                       |       |      | 0.33  |
| <b>Others</b>                                          |       |      | 10.57 |
| <b>Total</b>                                           |       |      | 96.34 |

a: Retention time on DB-5 capillary column in minutes.

b: Retention index
